# Supplementary material for: Material-agnostic characterization of spatially offset Raman spectroscopy in turbid media via Monte Carlo simulations
Source: Royal Society of Chemistry journal article supplement (doi:10.1039/d4an01044b), 2024-01-01
Supplement: d4an01044b1.pdf [file d4an01044b1.pdf]

## Supplementary Information

### Material-Agnostic Characterization of Spatially Offset Raman Spectroscopy in Turbid Media via Monte Carlo Simulations

Zuriel Erikson Joven<sup>a</sup>, Piyush Raj<sup>a</sup>, and Ishan Barman<sup>\* a,b,c</sup>

- a) Department of Mechanical Engineering, Johns Hopkins University, Baltimore, Maryland 21218, United States of America
- b) Department of Oncology, Johns Hopkins University, Baltimore, Maryland 21287, United States of America
- c) The Russell H. Morgan Department of Radiology and Radiological Science, The Johns Hopkins University, School of Medicine, Baltimore, Maryland 21205, United States of America

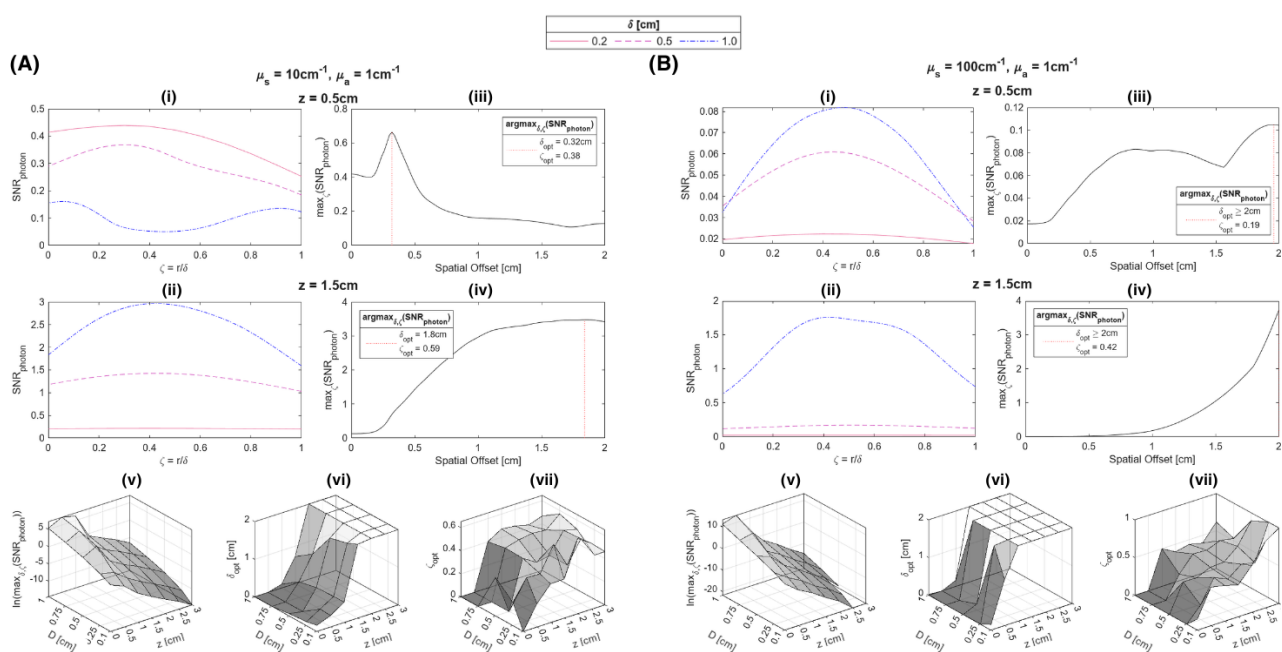

**Figure S1.** Maximum attainable  $SNR_{photon}$  values and corresponding  $\delta_{opt}$  and  $\zeta_{opt}$  values follow similar dependencies on  $D$  and  $z$  in different materials. Representative  $SNR_{photon}$  versus  $\zeta_{opt}$  plots at  $z = 0.5$  cm (i) and  $1.5$  cm (ii) and  $\delta = 0.2, 0.5, 1.0$  cm,  $\max_{\zeta}(SNR_{photon})$  versus  $\delta$  plots at  $z = 0.5$  cm (iii) and  $1.5$  cm (iv),  $\max_{\delta, \zeta}(SNR_{photon})$  versus  $(D, z)$  log-scale plots (v),  $\delta_{opt}$  versus  $(D, z)$  plots (vi), and  $\zeta_{opt}$  versus  $(D, z)$  plots (vii) for  $\mu_s = 10$  cm<sup>-1</sup>,  $\mu_a = 1$  cm<sup>-1</sup> (A) and  $\mu_s = 100$  cm<sup>-1</sup>,  $\mu_a = 1$  cm<sup>-1</sup> (B).

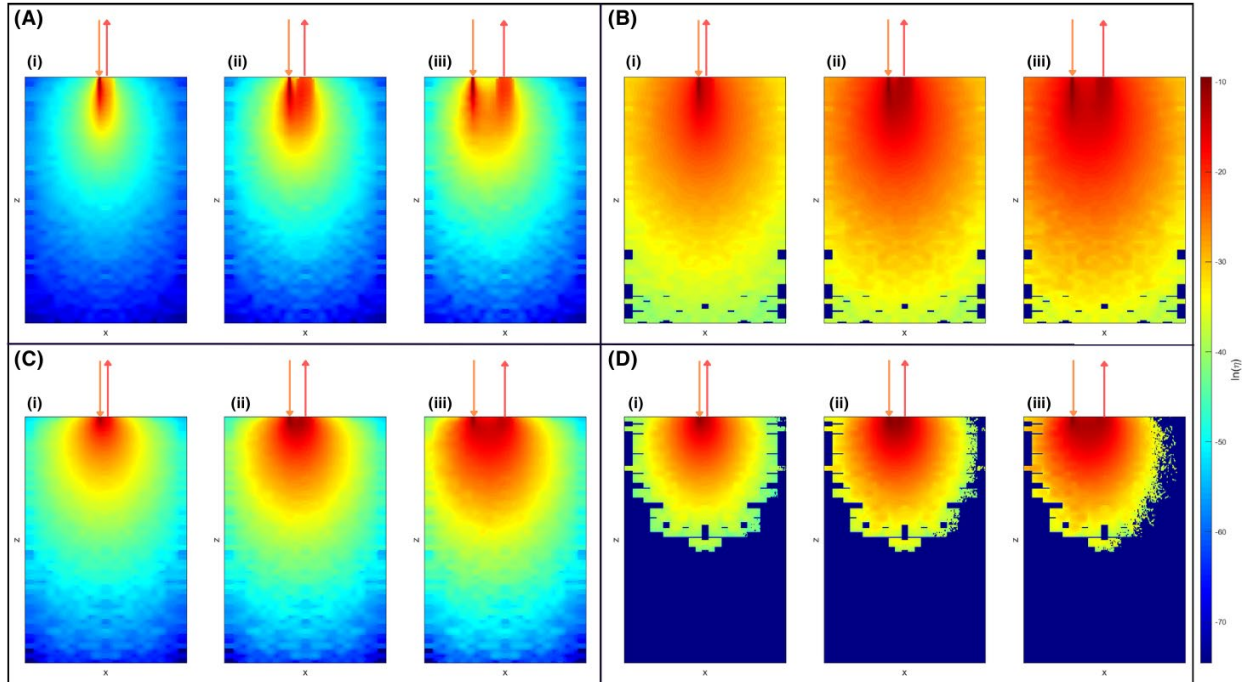

**Figure S2.** Visual representation of collected Raman intensity,  $\eta$ , in log-scale, along a two-dimensional slice coplanar to the excitation (orange arrow) and collection (red arrow) probes, at  $\delta = 0.2$  cm (i),  $\delta = 0.5$  cm (ii) and  $\delta = 1.0$  cm (iii), for  $\mu_s = 10$  cm<sup>-1</sup> &  $\mu_a = 0.1$  cm<sup>-1</sup> (A),  $\mu_s = 10$  cm<sup>-1</sup> &  $\mu_a = 1.0$  cm<sup>-1</sup> (B),  $\mu_s = 100$  cm<sup>-1</sup> &  $\mu_a = 0.1$  cm<sup>-1</sup> (C), and  $\mu_s = 100$  cm<sup>-1</sup> &  $\mu_a = 1.0$  cm<sup>-1</sup> (D).

Figure S2 shows that large values of  $\eta$  follow a curved subsurface path, with hotspots close to either the laser or detector. In some cases,  $\eta$  is clearly greater at the laser than at the detector (Figure 2A-C.ii-iii). The raw data and Monte Carlo code used to obtain the various  $\eta$  distributions in this study are available on Github: <https://github.com/zurieljoen/SORS-Simulations/>
